# Supplementary material for: Atomic structures of the RNA end-healing 5′-OH kinase and 2′,3′-cyclic phosphodiesterase domains of fungal tRNA ligase: conformational switches in the kinase upon binding of the GTP phosphate donor
Source: PubMed Central journal article supplement — Nucleic Acids Res. 2019 Nov 13;47(22):11826–38. doi: 10.1093/nar/gkz1049 (PMC7145591; doi:10.1093/nar/gkz1049), 2019-11-13
Supplement: gkz1049_supplemental_file.pdf [file gkz1049_supplemental_file.pdf]

Supplemental Material

**Atomic structures of the RNA end-healing 5'-OH kinase and 2',3'-cyclic phosphodiesterase domains of fungal tRNA ligase: conformational switches in the kinase upon binding of the GTP phosphate donor**

Ankan Banerjee, Yehuda Goldgur, Beate Schwer, and Stewart Shuman

Supplemental Table S1

Supplemental Figures S1, S2, S3, and S4

Table S1: Crystallographic data and refinement statistics

|                                                                     | KIN-CPD                          | KIN-D445N apo                    | KIN-D445N•GTP•Mg                              | KIN-D445N•IDP                                 | KIN-D445N•dGDP                                | KIN-D445N•GDP•Mg                              |
|---------------------------------------------------------------------|----------------------------------|----------------------------------|-----------------------------------------------|-----------------------------------------------|-----------------------------------------------|-----------------------------------------------|
| <b>Data collection</b>                                              |                                  |                                  |                                               |                                               |                                               |                                               |
| Beamline                                                            | 24ID-C                           | 24ID-E                           | 24ID-E                                        | 24ID-C                                        | 24ID-C                                        | 24ID-E                                        |
| Space group                                                         | P2 <sub>1</sub>                  | C222 <sub>1</sub>                | P2 <sub>1</sub> 2 <sub>1</sub> 2 <sub>1</sub> | P2 <sub>1</sub> 2 <sub>1</sub> 2 <sub>1</sub> | P2 <sub>1</sub> 2 <sub>1</sub> 2 <sub>1</sub> | P2 <sub>1</sub> 2 <sub>1</sub> 2 <sub>1</sub> |
| Cell dimensions<br>a, b, c (Å)<br>$\alpha$ , $\beta$ , $\gamma$ (°) | 77.5, 77.7, 79.5<br>90, 93.5, 90 | 55.4, 122.9, 150.6<br>90, 90, 90 | 50.2, 55.7, 81.8<br>90, 90, 90                | 56.7, 58.4, 72.3<br>90, 90, 90                | 50.1, 56.4, 82.5<br>90, 90, 90                | 50.6, 55.4, 81.4<br>90, 90, 90                |
| Resolution (Å)                                                      | 50-1.95<br>(2.0-1.95)            | 50-1.98<br>(2.01-1.98)           | 50-1.85<br>(1.88-1.85)                        | 50-1.53<br>(1.56-1.53)                        | 50-1.7<br>(1.73-1.7)                          | 50-1.71<br>(1.74-1.71)                        |
| Wavelength (Å)                                                      | 0.9717                           | 0.9791                           | 0.9791                                        | 0.9717                                        | 0.9717                                        | 0.9792                                        |
| R <sub>pim</sub>                                                    | 0.037 (0.356)                    | 0.024 (0.269)                    | 0.036 (0.248)                                 | 0.040 (0.301)                                 | 0.026 (0.269)                                 | 0.035 (0.227)                                 |
| CC(1/2)                                                             | 0.998 (0.863)                    | 0.997 (0.842)                    | 1.000 (0.754)                                 | 1.000 (0.772)                                 | 0.994 (0.803)                                 | 0.994 (0.829)                                 |
| $\langle I \rangle / \langle \sigma \rangle$                        | 23.0 (2.0)                       | 37.2 (2.2)                       | 29.5 (2.6)                                    | 23.0 (2.4)                                    | 35.6 (2.4)                                    | 32.0 (2.0)                                    |
| Completeness (%)                                                    | 96.3 (83.1)                      | 95.8 (73.7)                      | 99.1 (92.3)                                   | 97.3 (73.2)                                   | 97.4 (77.0)                                   | 93.0 (52.0)                                   |
| Redundancy                                                          | 3.9 (2.7)                        | 6.1 (5.4)                        | 5.5 (3.9)                                     | 3.8 (1.7)                                     | 5.8 (4.0)                                     | 4.6 (2.7)                                     |
| Unique reflections                                                  | 38436                            | 34731                            | 20105                                         | 36059                                         | 25854                                         | 23552                                         |
| <b>Refinement</b>                                                   |                                  |                                  |                                               |                                               |                                               |                                               |
| R <sub>work</sub> / R <sub>free</sub>                               | 0.185 / 0.221                    | 0.193 / 0.236                    | 0.170 / 0.215                                 | 0.174 / 0.208                                 | 0.180 / 0.209                                 | 0.186 / 0.208                                 |
| B-factors (Å <sup>2</sup> )<br>Average/Wilson                       | 52.7 / 34.2                      | 60.1 / 36.5                      | 33.7 / 24.6                                   | 26.0 / 15.9                                   | 38.6 / 24.3                                   | 32.4 / 23.1                                   |
| RMS deviations<br>bond lengths (Å)<br>bond angles (°)               | 0.007<br>0.930                   | 0.009<br>1.220                   | 0.007<br>0.887                                | 0.006<br>0.870                                | 0.006<br>0.867                                | 0.006<br>0.893                                |
| Ramachandran<br>% favored<br>% allowed<br>outliers                  | 96.8<br>3.2<br>0                 | 97.8<br>2.2<br>0                 | 99.0<br>1.0<br>0                              | 99.6<br>0.4<br>0                              | 98.2<br>1.8<br>0                              | 99.0<br>1.0<br>0                              |
| <b>Model contents</b>                                               |                                  |                                  |                                               |                                               |                                               |                                               |
| Protomers/ASU                                                       | 1                                | 2                                | 1                                             | 1                                             | 1                                             | 1                                             |
| Protein residues                                                    | 413                              | 421                              | 216                                           | 223                                           | 224                                           | 211                                           |
| Ions                                                                | 1 Mg, 1 PO <sub>4</sub>          | 2 PO <sub>4</sub>                | 1 Mg                                          | 1 PO <sub>4</sub>                             | 1 PO <sub>4</sub>                             | 1 Mg                                          |
| Ligand                                                              | GDP                              | -                                | GTP                                           | IDP                                           | dGDP                                          | GDP                                           |
| Water                                                               | 168                              | 168                              | 158                                           | 259                                           | 170                                           | 157                                           |
| <b>PDB ID</b>                                                       | 6U05                             | 6U00                             | 6U03                                          | 6TZX                                          | 6TZ0                                          | 6TZM                                          |

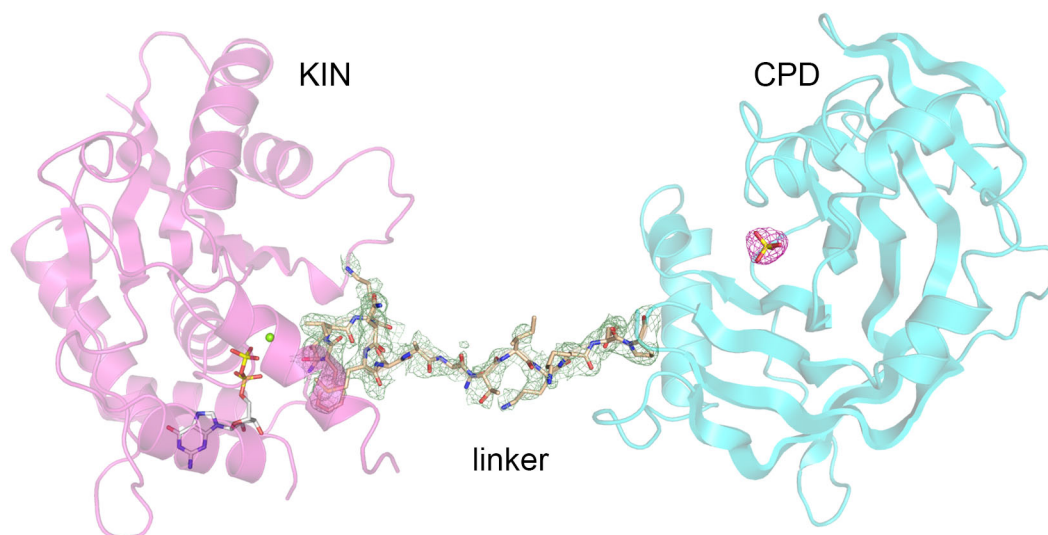

Figure S1. Electron density ( $2F_o-F_c$ ) for the interdomain linker and a phosphate anion in the CPD active site. The KIN-CPD protomer is shown as a cartoon trace. The linker, colored beige, is depicted as a stick model. The density map overlying the linker is shown as a light green mesh contoured at  $0.5 \sigma$ . The  $2F_o-F_c$  electron density map overlying the phosphate anion stick model is depicted as a magenta mesh contoured at  $1.5 \sigma$ .

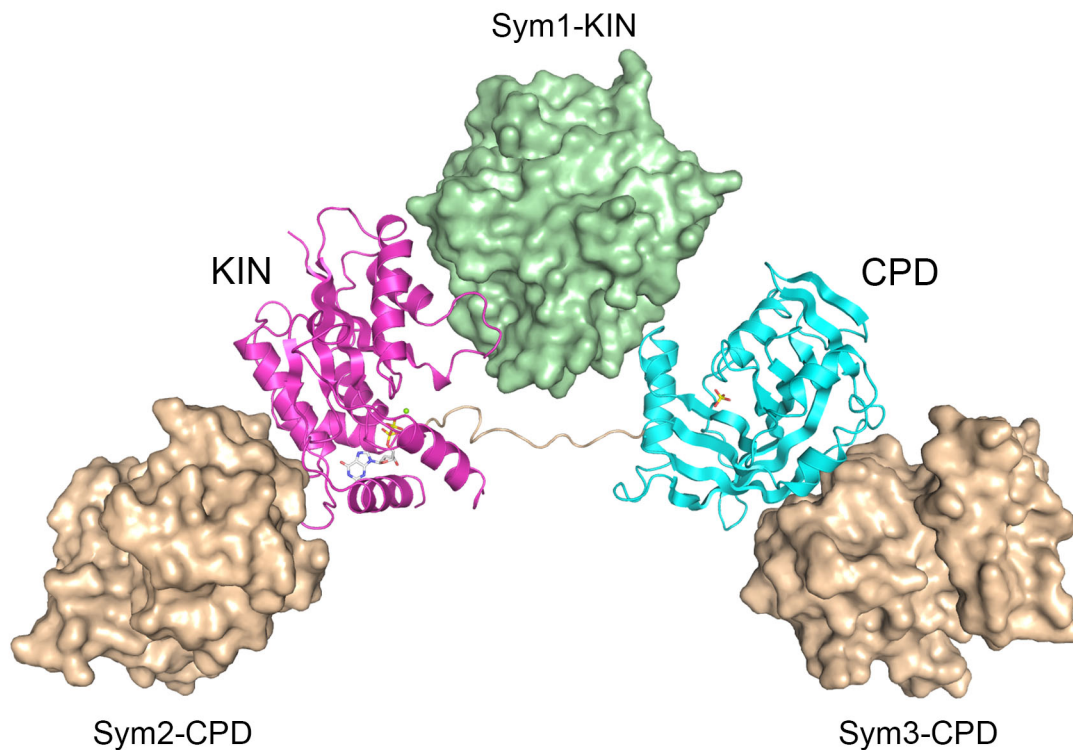

Figure S2. Crystal packing contacts of the KIN-CPD protomer. The KIN-CPD tertiary structure is shown as a cartoon model with the KIN domain in magenta, CPD domain in cyan, and the interdomain linker in beige. Three symmetry related protein molecules (Sym1, Sym2, and Sym3) that about KIN-CPD in the crystal lattice are shown as surface models. The Sym1 KIN domain (colored light green) packs into the space between the KIN and CPD domains of the protomer and its interface with KIN-CPD comprises an area of 835 Å<sup>2</sup>. The Sym2 and Sym3 CPD domains (colored beige) pack against the KIN and CPD domains of the protomer, respectively, and their interfaces with the protomer comprise 577 Å<sup>2</sup> and 435 Å<sup>2</sup>, respectively. Analysis of the three interfaces in PISA returned a Complex Formation Significance Score of 0.000, implying that these interfaces are the result of crystal packing only.

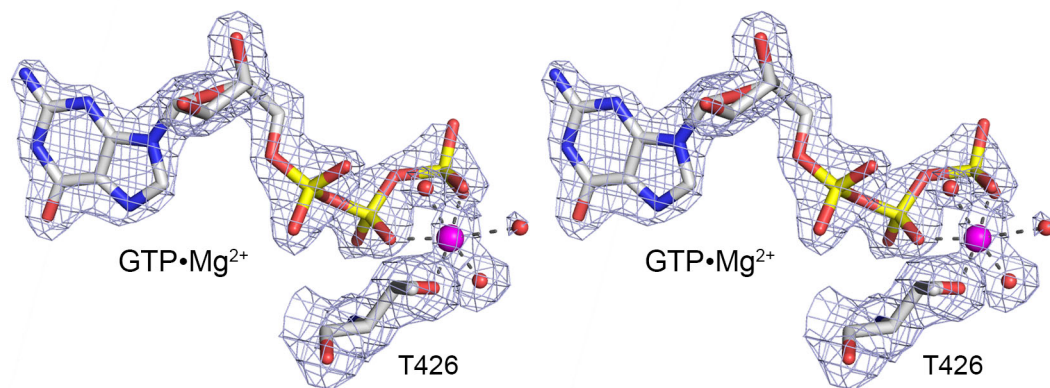

Figure S3. A stereo view of the  $2F_o - F_c$  simulated annealed omit map contoured at  $1.5 \sigma$  and superimposed on the refined model of GTP and magnesium in the KIN active site.

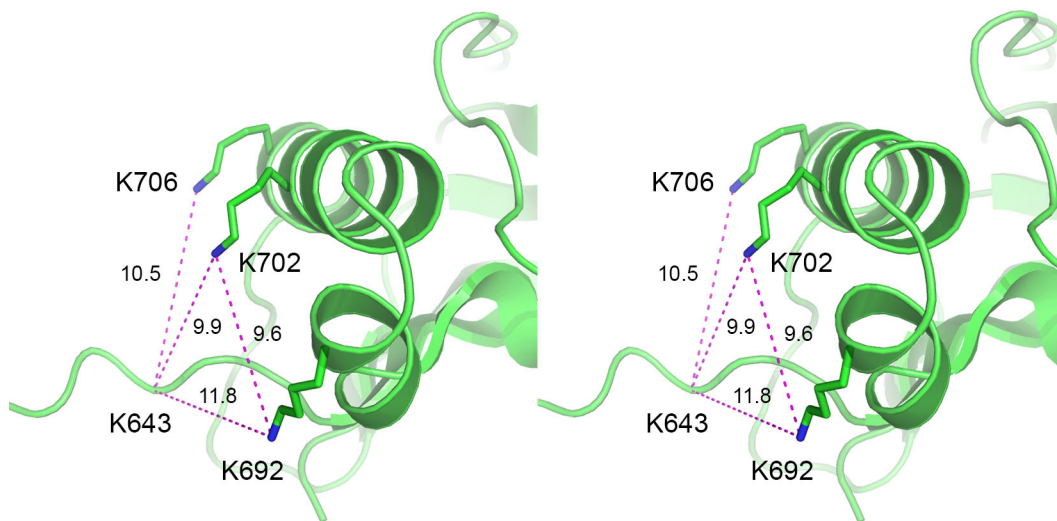

Figure S4. Correlation of lysine chemical crosslinking data for *Coccidioides immitis* CPD with the structure of *Candida albicans* CPD. Stereo depiction of the pairs of lysine crosslinks identified in the CPD domain of *Coccidioides* Trl1 that involve amino acids conserved in *Candida* CPD. The distances (Å) between the K702 and K692 N $\zeta$  atoms is shown, as are the distances between the K643 C $\alpha$  atom (Lys643 being in the linker, we presume that its side chain has no fixed position in solution) and the K692, K702, and K706 N $\zeta$  atoms.
